# Supplementary material
Source: PubMed Central journal article supplement (PMC6628906)
Supplement: NIHMS1513222-supplement-Supplemental_Material.pdf [file NIHMS1513222-supplement-Supplemental_Material.pdf]

## **SUPPLEMENTAL MATERIAL**

**Figure I.** Axial CT angiogram maximum intensity projection of two patients enrolled in DEFUSE 3, both with a right M1 occlusion (not shown). A: right hemisphere shows a paucity of distal MCA arborization, consistent with poor collaterals on the Tan scale. B: right hemisphere shows an exuberant number of distal vessels despite the M1 occlusion, consistent with good collaterals on the Tan scale.

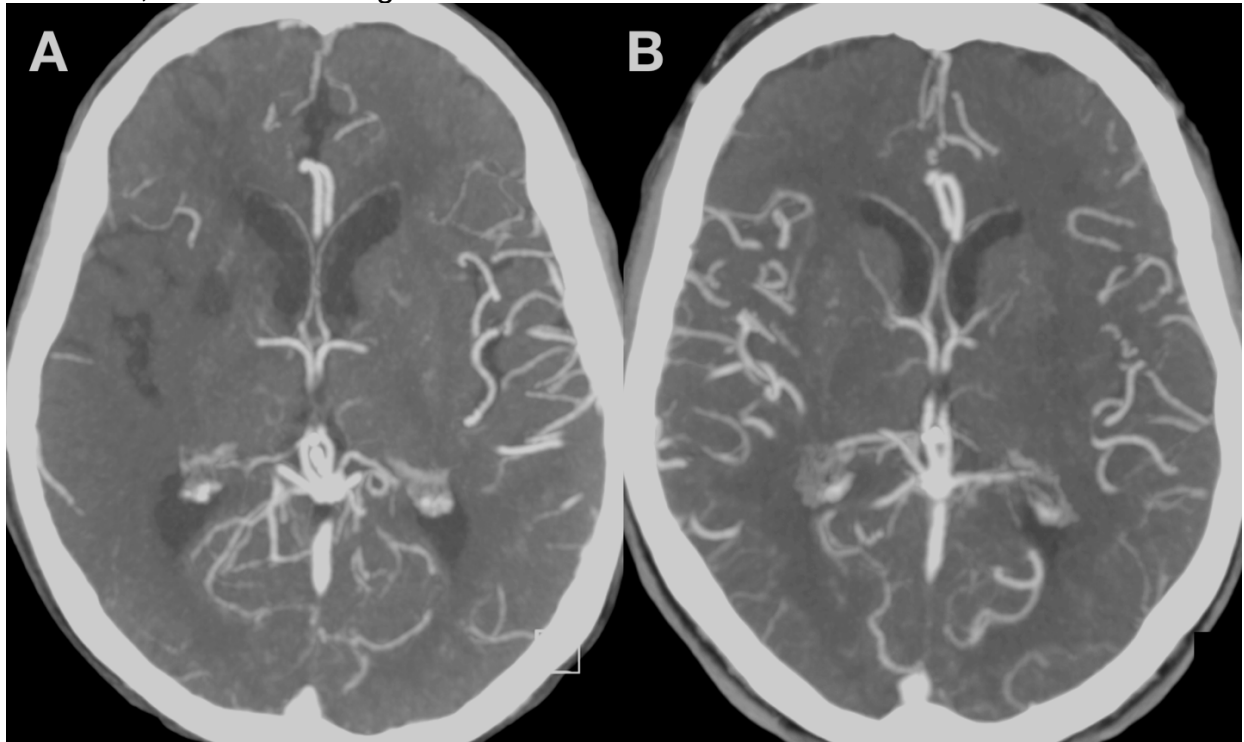

**Figure II.** Box and whisker plot showing absolute infarct volume (mL) on baseline baseline imaging, with patients stratified by good versus poor collaterals for the (A) binary Tan collateral scale and (B) a dichotomization of the ordinal categories of the Maas collateral scale [good (3-5) versus bad (1-2) collaterals]. For both collateral scales, the baseline infarct volume was significantly smaller in patients with good collaterals ( $p<0.05$ ).

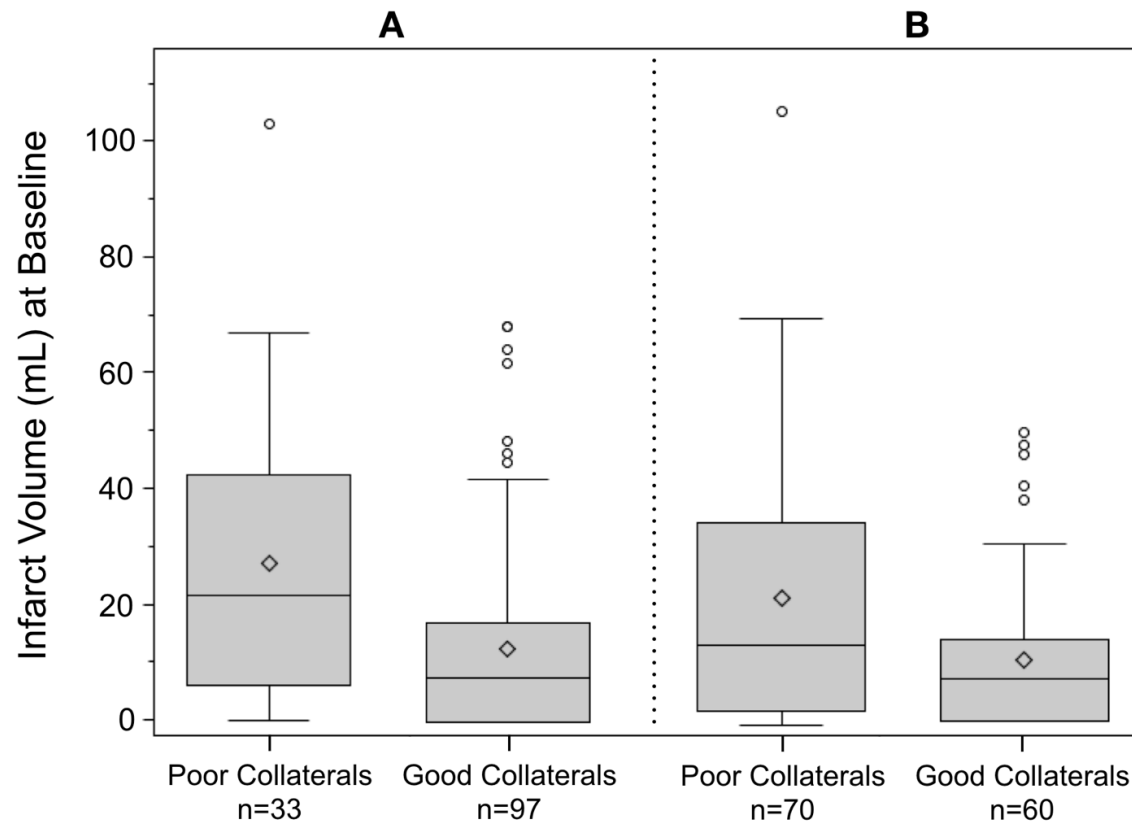

**Figure III.** Box and whisker plot showing absolute infarct volume (mL) on 24-hour follow-up imaging, with patients stratified by the ordinal categories of the Maas collateral scale and further divided by reperfused/recanalized (red, N=54) and not reperfused/recanalized (blue, n=62). Collateral status was not associated with a significant difference in infarct volume ( $p=0.192$  for entire cohort,  $p=0.218$  for not reperfused/recanalized,  $0.203$  in reperfused, Kruskal-Wallis test). However, Jonckheere-Terpstra test for ordered differences in the Maas scale is significant for combined ( $p=0.038$ ) and in not reperfused/recanalized ( $p=0.043$ ), but not for the reperfused/recanalized patients ( $p=0.143$ ).

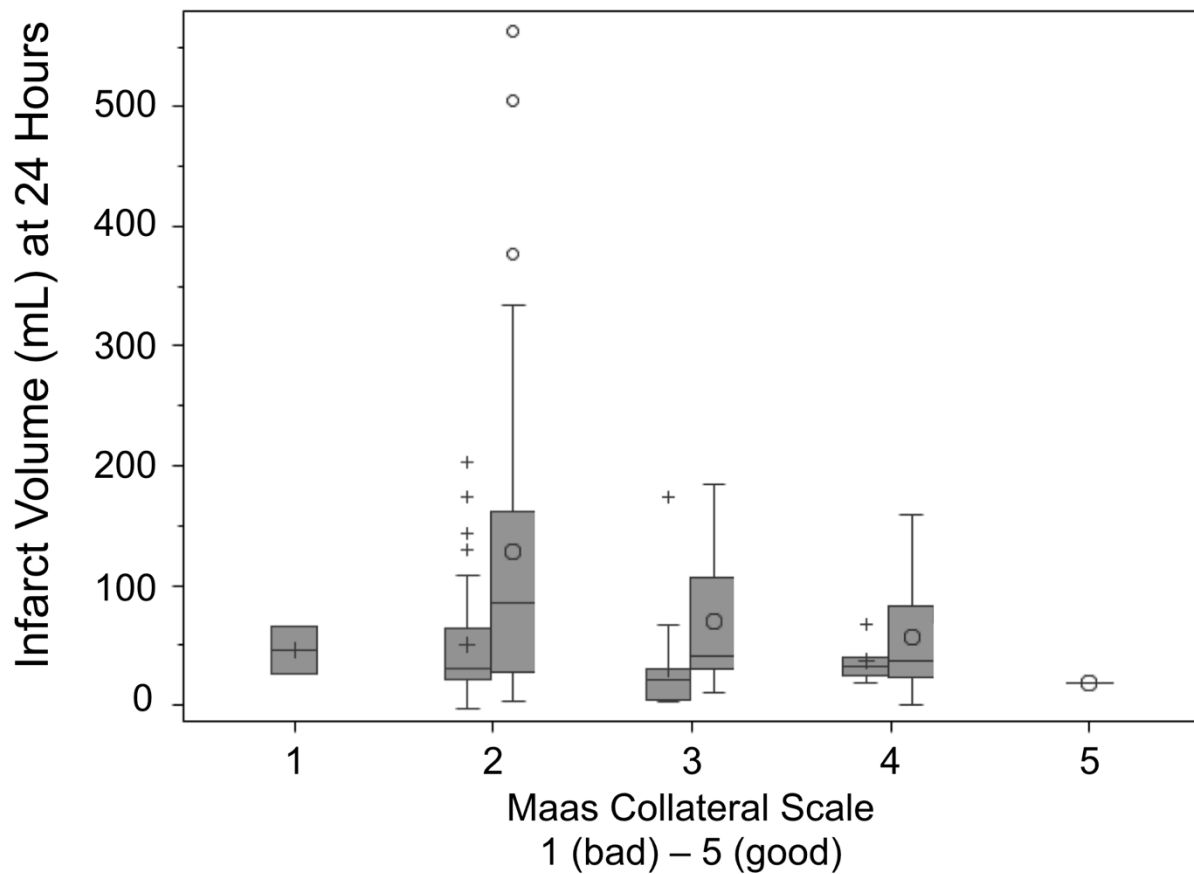

**Table I:** Demographics of entire cohort, patients with good and poor collaterals and p-value for difference between dichotomized Maas collateral status arms.

|                       | Good collaterals<br>(Maas = 3-5)<br>(n=61) | Poor collaterals<br>(Maas = 1-2)<br>(n=70) | p-value      |
|-----------------------|--------------------------------------------|--------------------------------------------|--------------|
| Age                   | 71 (58-78)                                 | 71 (60-81)                                 | 0.846        |
| Female                | 28 (46)                                    | 35 (50)                                    | 0.640        |
| Ethnicity Hispanic    | 4 (7)                                      | 8 (12)                                     | 0.322        |
| Race White            | 54 (89)                                    | 58 (83)                                    | 0.358        |
| HTN                   | 48 (79)                                    | 57 (81)                                    | 0.695        |
| HLD                   | 29 (48)                                    | 34 (49)                                    | 0.906        |
| Atrial fib            | 26 (43)                                    | 23 (33)                                    | 0.249        |
| DM                    | 19 (31)                                    | 19 (27)                                    | 0.614        |
| Prior CVA             | 8 (13)                                     | 13 (19)                                    | 0.396        |
| Presentation NIHSS    | 16 (12-21)                                 | 17 (12-20)                                 | 0.996        |
| Treated with tPA      | 4 (7)                                      | 4 (6)                                      | 1.0          |
| MCA occlusion         | 35 (57)                                    | 47 (67)                                    | 0.249        |
| Ischemic core (mL)    | 7.1 (0-13.8)                               | 13.6 (2.4-34.3)                            | <b>0.010</b> |
| Perfusion lesion (mL) | 99.0 (58.3-160.3)                          | 129.0 (88.0-163.6)                         | <b>0.034</b> |
| Mismatch volume (mL)  | 88.5 (49.3-145.7)                          | 107.0 (72.7-132.5)                         | 0.260        |

|                                            |                    |                     |                  |
|--------------------------------------------|--------------------|---------------------|------------------|
| Hypoperfusion intensity ratio              | 0.25 (0.15-0.43)   | 0.44 (0.26-0.58)    | <b>&lt;0.001</b> |
| Time from stroke onset to baseline imaging | 10:43 (8:49-11:49) | 9:49 (8:12-11:36)   | 0.208            |
| Time from stroke onset to femoral puncture | 11:36 (9:41-12:37) | 11:24 (9:49-13:13)  | 0.964            |
| Time from stroke onset to reperfusion      | 12:42 (9:48-13:33) | 12:17 (11:00-13:42) | 0.828            |
| ASPECTS                                    | 8 (7-9)            | 8 (7-9)             | 0.444            |
| Right hemisphere stroke                    | 24 (39)            | 36 (51)             | 0.166            |
| Baseline SBP                               | 148 (136-162)      | 143 (128-159)       | 0.077            |
| Creatinine                                 | 0.96 (0.78-1.1)    | 0.9 (0.78-1.2)      | 0.886            |
| Glucose                                    | 122 (109-151)      | 125 (108-155)       | 0.950            |
| WBC                                        | 8.9 (6.8-10.7)     | 8.95 (6.98-10.9)    | 0.791            |
| Platelets                                  | 212 (164-260)      | 219 (174-262)       | 0.593            |
| Hematocrit                                 | 40.9 (37.0-43.4)   | 40.8 (36.9-43.3)    | 0.597            |
| INR                                        | 1.04 (1.0-1.1)     | 1.1 (1.0-1.2)       | 0.343            |

Notes:

- 1) Ischemic core = relative cerebral blood flow <30%; perfusion lesion = Tmax <6 seconds; mismatch volume = perfusion lesion-lesion core.
- 2) Continuous variables: median (IQR); categorical data: n(%).

**Table II:** Selected outcomes in DEFUSE 3 for the entire cohort, patients with good and poor collaterals and p-value for difference between Maas collateral status arms.

|                                               | Good collaterals<br>(Maas = 3-5)<br>(n=61) | Poor collaterals<br>(Maas = 1-2)<br>(n=70) | p-value      |
|-----------------------------------------------|--------------------------------------------|--------------------------------------------|--------------|
| Early neurologic deterioration                | 9 (15)                                     | 4 (6)                                      | 0.084        |
| Infarct volume (mL) at 24 hours               | 32.8 (18.4-67.0)                           | 51.1 (28.3-130.0)                          | <b>0.033</b> |
| Infarct growth (mL) from baseline to 24 hours | 27.0 (13.2-50.5)                           | 38.0 (13.2-94.8)                           | 0.188        |
| Perfusion lesion (mL) at 24 hours             | 14.4 (0-57.4)                              | 6.8 (0-69.2)                               | 0.997        |
| Mismatch volume (mL) at 24 hours              | -18.9 (-37.9 - -3.2)                       | -34.0 (-87.2 - -7.0)                       | <b>0.035</b> |
| Endovascular therapy randomization            | 28 (46)                                    | 38 (54)                                    | 0.338        |
| Reperfusion >90%*                             | 21 (44)                                    | 26 (50)                                    | 0.532        |
| Complete recanalization on CTA/MRA            | 26 (48)                                    | 31 (52)                                    | 0.708        |
| Reperfusion and/or recanalization             | 23 (42)                                    | 30 (48)                                    | 0.476        |
| Symptomatic ICH                               | 3 (5)                                      | 3 (4)                                      | 1.0          |
| Parenchymal hematoma 2 (ECASS II)             | 2 (3)                                      | 6 (9)                                      | 0.283        |
| Modified Rankin scale 0-2 at 90 days          | 17 (28)                                    | 25 (36)                                    | 0.337        |
| Stroke-related death at 90 days               | 12 (20)                                    | 14 (20)                                    | 0.963        |

Notes:

1) Continuous variables: median (IQR); categorical data: n(%).
